# Supplementary material
Source: PubMed Central journal article supplement (PMC11626267)
Supplement: ajcr0014-5400-f5.pdf [file ajcr0014-5400-f5.pdf]

## ML models in endometrial cancer

**Table S1.** Comparison of preoperative MRI staging by radiologists and pathological staging

| MRI staging | Pathological Staging |    |    |     |    | Total |
|-------------|----------------------|----|----|-----|----|-------|
|             | Ia                   | Ib | II | III | IV |       |
| Ia          | 28                   | 3  | 1  | 1   | 0  | 33    |
| Ib          | 1                    | 15 | 0  | 1   | 0  | 17    |
| II          | 1                    | 1  | 4  | 2   | 0  | 8     |
| III         | 1                    | 0  | 0  | 3   | 1  | 5     |
| IV          | 0                    | 0  | 0  | 0   | 3  | 3     |
| Total       | 31                   | 19 | 5  | 7   | 4  | 66    |

**Table S2.** Preoperative staging of MRI diagnostic test evaluation index

| MRI staging | Sensitivity | Specificity |
|-------------|-------------|-------------|
| Ia          | 90.30%      | 87.80%      |
| Ib          | 78.90%      | 94.10%      |
| II          | 80.00%      | 93.90%      |
| III         | 62.50%      | 96.70%      |
| IV          | 75.00%      | 95.00%      |

**Table S3.** The 10 most important features based on feature importance score in the combined model

| Radiomic feature                             | MRI sequence | Feature importance score |
|----------------------------------------------|--------------|--------------------------|
| Firstorder-Kurtosis-Value                    | CE-T1W       | 0.97826                  |
| GLSZM-Zoneentropy-Value                      | CE-T1W       | 0.95652                  |
| GLSZM-Graylevelvariance-Value                | T2W          | 0.95652                  |
| GLRLM-Highgraylevelrunemphasis-Value         | DWI          | 0.94392                  |
| GLRLM-Graylevelvariance-Value                | CE-T1W       | 0.94333                  |
| GLSZM-Zoneentropy-Value                      | T2W          | 0.93342                  |
| Shape-Majoraxislength-Value                  | T2W          | 0.92344                  |
| GLRLM-Graylevelnonuniformity-Value           | DWI          | 0.91282                  |
| GLCM-Inversedifferencemomentnormalized-Value | CE-T1W       | 0.91182                  |
| GLRLM-Graylevelnonuniformity-Value           | CE-T1W       | 0.90281                  |
